# Supplementary material
Source: MDPI journal article supplement (https://www.mdpi.com/1424-2818/15/3/405)
Supplement: s1 [file s1 › diversity-2176587-supplementary.pdf]

## Supplementary material

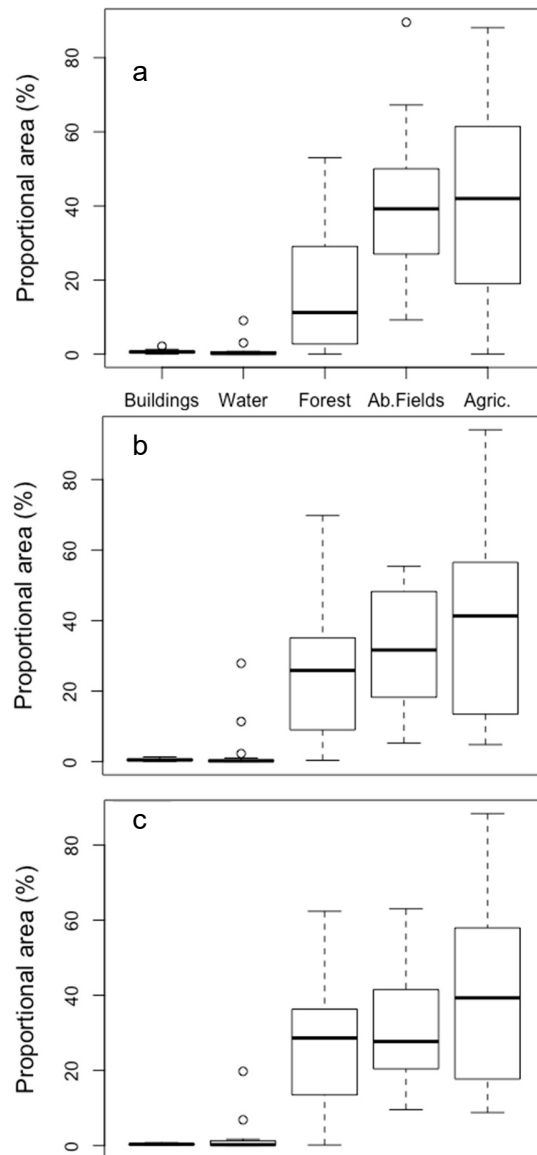

**Figure S1.** Boxplots showing the proportional area of different land cover types sampled within a) 500 m, b) 1000 m, and c) 2000 m radii in the landscape surrounding highbush blueberry fields. Lines across each box represents the median (N= 18).

**Table S1.** Geographic coordinates, area, and shrub density of the 18 commercial highbush blueberry fields where wild bees were sampled in Montérégie, Canada.

| Field Name            | Geographic coordinates<br>(DD) | Field Area<br>(ha) | No. of shrub | Shrub density<br>(1/ha) |
|-----------------------|--------------------------------|--------------------|--------------|-------------------------|
| Charbonneau           | 45.681094N; 73.2964W           | 1.25               | 3600         | 2880.00                 |
| Bleuesime             | 45.216417N; 73.260533W         | 0.8                | 1200         | 1500.00                 |
| Sylvie Remillard      | 45.023469N; 73.929875W         | 3.1                | 5000         | 1612.90                 |
| Alain Menard          | 45.079583N; 72.879433W         | 2                  | 4000         | 2000.00                 |
| Bleuets du ridge      | 45.113644N; 72.920956W         | 0.8                | 6500         | 8125.00                 |
| La colline au bleuets | 45.173981N; 72.716811W         | 1.2                | 1700         | 1416.67                 |
| Les delisles          | 45.25435N; 72.73265W           | 2.5                | 4300         | 1720.00                 |
| Bleuetiere du boise   | 45.356933N; 72.75925W          | 2.2                | 4000         | 1818.18                 |
| Bleuetiere Giard      | 45.428633N; 72.69825W          | 1                  | 5000         | 5000.00                 |
| Joualbleu             | 45.7829N; 73.00185W            | 3                  | 3000         | 1000.00                 |
| Machabee              | 45.057933N; 73.887733W         | 14                 | 9000         | 642.86                  |
| Aux dames bleuets     | 45.98725N; 72.895217W          | 0.5                | 2250         | 4500.00                 |
| Bleu ciel             | 45.573067N; 72.906933W         | 2                  | 4200         | 2100.00                 |
| Ferme equinoxe        | 45.527908N; 72.897864W         | 2.3                | 3700         | 1608.70                 |
| Reve Bleu             | 45.508433N; 72.963283W         | 7                  | 12500        | 1785.71                 |
| Domaine du flanc sud  | 45.532483N; 73.169617W         | 3                  | 5700         | 1900.00                 |
| Jutras                | 45.325639N; 73.09513W          | 10                 | 8000         | 800.00                  |
| Sur le Champs         | 45.331317N; 73.063272W         | 3                  | 3000         | 1000.00                 |

**Table S2.** Generalized linear models for visual data showing the relationships of wild bee flower visit and visiting richness as a function of different factors at the 2000 m, 1000 m, and 500 m scales. The Akaike Information Criterion for small samples (AICc) and the Nagelkerke's ratio adjusted pseudo- $R^2$  (adj.  $R^2$ ) from the regression models are presented. Models are sorted according to their AICc. K represents the number of parameters in the model. Forest, in bold font, is the main factor to be tested whereas covariates, in normal font, correspond to potentially confounding factors. Models for flower visits are Negative Binomial regressions. Models for richness are Poisson regressions.

| Radius (m) |                                     | Bee Flower Visit |         |            | Visiting Richness                   |   |        |            |
|------------|-------------------------------------|------------------|---------|------------|-------------------------------------|---|--------|------------|
| 2000       | Model                               | K                | AICc    | adj- $R^2$ | Model                               | K | AICc   | adj- $R^2$ |
|            | <b>Forest</b>                       | 3                | 162.392 | 0.385      | Plant Density                       | 2 | 70.284 | 0.178      |
|            | Leaf Temperature                    | 3                | 165.266 | 0.193      | <b>Forest</b>                       | 2 | 70.543 | 0.141      |
|            | Forest + Leaf Temperature           | 4                | 165.670 | 0.391      | Abandoned Fields                    | 2 | 71.266 | 0.035      |
|            | Forest + Abandoned Fields           | 4                | 165.690 | 0.389      | Leaf Temperature                    | 2 | 71.480 | 0.003      |
|            | Forest + Plant density              | 4                | 165.723 | 0.387      | Forest + Plant Density              | 3 | 72.367 | 0.294      |
|            | Abandoned Fields                    | 3                | 167.725 | 0.001      | Abandoned Fields + Plant Density    | 3 | 72.977 | 0.209      |
|            | Plant Density                       | 3                | 167.737 | 0.000      | Forest + Leaf Temperature           | 3 | 73.189 | 0.180      |
|            | Abandoned Fields + Leaf Temperature | 4                | 168.586 | 0.196      | Leaf Temperature + Plant Density    | 3 | 73.198 | 0.178      |
|            | Leaf Temperature + Plant Density    | 4                | 168.594 | 0.196      | Forest + Abandoned Field            | 3 | 73.359 | 0.155      |
|            | Abandoned Fields + Plant Density    | 4                | 171.088 | 0.001      | Abandoned Fields + Leaf Temperature | 3 | 74.177 | 0.035      |
| 1000       |                                     |                  |         |            |                                     |   |        |            |
|            | <b>Forest</b>                       | 3                | 161.980 | 0.411      | Plant Density                       | 2 | 70.284 | 0.178      |
|            | Forest + Leaf Temperature           | 4                | 165.232 | 0.417      | <b>Forest</b>                       | 2 | 71.044 | 0.068      |
|            | Leaf Temperature                    | 3                | 165.266 | 0.193      | Abandoned Fields                    | 2 | 71.221 | 0.042      |
|            | Forest + Plant density              | 4                | 165.314 | 0.412      | Leaf Temperature                    | 2 | 71.480 | 0.003      |
|            | Forest + Abandoned Fields           | 4                | 165.340 | 0.411      | Abandoned Fields + Plant Density    | 3 | 72.806 | 0.233      |
|            | Abandoned Fields                    | 3                | 167.717 | 0.002      | Forest + Plant Density              | 3 | 72.813 | 0.232      |
|            | Plant Density                       | 3                | 167.737 | 0.000      | Leaf Temperature + Plant Density    | 3 | 73.198 | 0.178      |
|            | Abandoned Fields + Leaf Temperature | 4                | 168.592 | 0.196      | Forest + Abandoned Fields           | 3 | 73.829 | 0.087      |
|            | Leaf Temperature + Plant Density    | 4                | 168.594 | 0.196      | Forest + Leaf Temperature           | 3 | 73.875 | 0.080      |

|                                     |   |         |       |                                     |   |        |       |
|-------------------------------------|---|---------|-------|-------------------------------------|---|--------|-------|
| Abandoned Fields + Plant Density    | 4 | 171.079 | 0.002 | Abandoned Fields + Leaf Temperature | 3 | 74.136 | 0.042 |
| 500                                 |   |         |       |                                     |   |        |       |
| Leaf Temperature                    | 3 | 165.266 | 0.193 | Plant Density                       | 2 | 70.284 | 0.178 |
| <b>Forest</b>                       | 3 | 166.106 | 0.131 | <b>Forest</b>                       | 2 | 71.248 | 0.038 |
| Abandoned Fields                    | 3 | 167.265 | 0.039 | Abandoned Fields                    | 2 | 71.307 | 0.029 |
| Abandoned Fields + Leaf Temperature | 4 | 167.607 | 0.265 | Leaf Temperature                    | 2 | 71.480 | 0.003 |
| Plant Density                       | 3 | 167.737 | 0.000 | Abandoned Fields + Plant Density    | 3 | 72.680 | 0.251 |
| Forest + Leaf Temperature           | 4 | 168.361 | 0.213 | Forest + Plant Density              | 3 | 72.989 | 0.208 |
| Leaf Temperature + Plant Density    | 4 | 168.594 | 0.196 | Leaf Temperature + Plant Density    | 3 | 73.198 | 0.178 |
| Forest + Abandoned Fields           | 4 | 168.914 | 0.172 | Forest + Abandoned Fields           | 3 | 73.961 | 0.068 |
| Forest + Plant density              | 4 | 169.448 | 0.132 | Forest + Leaf Temperature           | 3 | 73.969 | 0.067 |
| Abandoned Fields + Plant Density    | 4 | 170.588 | 0.042 | Abandoned Fields + Leaf Temperature | 3 | 74.213 | 0.030 |

**Table S3.** Generalized linear models for pan traps data showing the relationships of wild bee trapped abundance and trapped richness as a function of different factors at the 2000 m, 1000 m, and 500 m scales. The Akaike Information Criterion for small samples (AICc) and the Nagelkerke's ratio adjusted pseudo-R<sup>2</sup> (adj. R<sup>2</sup>) from the regression models are presented. Models are sorted according to their AICc. K represents the number of parameters in the model. Forest, in bold font, is the main factor to be tested whereas covariates, in normal font, correspond to potentially confounding factors. Models for trapped abundance and trapped richness are Negative Binomial regressions.

| Radius (m) | Trapped Abundance                   |   |        |                    | Trapped Richness                    |   |        |                    |
|------------|-------------------------------------|---|--------|--------------------|-------------------------------------|---|--------|--------------------|
| 2000       | Model                               | K | AICc   | adj-R <sup>2</sup> | Model                               | K | AICc   | adj-R <sup>2</sup> |
|            | <b>Forest</b>                       | 3 | 90.261 | 0.390              | <b>Forest</b>                       | 3 | 83.726 | 0.246              |
|            | Forest + Abandoned Fields           | 4 | 92.020 | 0.484              | Abandoned Fields                    | 3 | 84.528 | 0.185              |
|            | Forest + Plant density              | 4 | 93.083 | 0.422              | Forest + Abandoned Fields           | 4 | 84.857 | 0.393              |
|            | Forest + Leaf Temperature           | 4 | 93.618 | 0.390              | Leaf Temperature                    | 3 | 86.155 | 0.062              |
|            | Abandoned Fields                    | 3 | 93.906 | 0.132              | Forest + Plant density              | 4 | 86.503 | 0.285              |
|            | Leaf Temperature                    | 3 | 94.734 | 0.068              | Plant Density                       | 3 | 86.597 | 0.026              |
|            | Plant Density                       | 3 | 95.348 | 0.018              | Forest + Leaf Temperature           | 4 | 87.087 | 0.246              |
|            | Abandoned Fields + Leaf Temperature | 4 | 96.981 | 0.154              | Abandoned Fields + Plant Density    | 4 | 87.336 | 0.224              |
|            | Abandoned Fields + Plant Density    | 4 | 97.023 | 0.151              | Abandoned Fields + Leaf Temperature | 4 | 87.680 | 0.201              |
|            | Leaf Temperature + Plant Density    | 4 | 97.796 | 0.092              | Leaf Temperature + Plant Density    | 4 | 89.024 | 0.101              |
| 1000       |                                     |   |        |                    |                                     |   |        |                    |
|            | Abandoned Fields                    | 3 | 89.882 | 0.403              | Abandoned Fields                    | 3 | 81.221 | 0.400              |
|            | Forest + Abandoned Fields           | 4 | 91.559 | 0.506              | Forest + Abandoned Fields           | 4 | 83.844 | 0.449              |
|            | <b>Forest</b>                       | 3 | 91.923 | 0.277              | Abandoned Fields + Plant Density    | 4 | 84.312 | 0.415              |
|            | Abandoned Fields + Plant Density    | 4 | 93.185 | 0.406              | Abandoned Fields + Leaf Temperature | 4 | 84.582 | 0.401              |
|            | Abandoned Fields + Leaf Temperature | 4 | 93.242 | 0.403              | <b>Forest</b>                       | 3 | 84.661 | 0.176              |
|            | Forest + Plant density              | 4 | 94.707 | 0.315              | Leaf Temperature                    | 3 | 86.155 | 0.062              |
|            | Leaf Temperature                    | 3 | 94.734 | 0.068              | Plant Density                       | 3 | 86.597 | 0.026              |
|            | Forest + Leaf Temperature           | 4 | 95.154 | 0.286              | Forest + Plant density              | 4 | 87.334 | 0.225              |
|            | Plant Density                       | 3 | 95.348 | 0.018              | Forest + Leaf Temperature           | 4 | 87.911 | 0.185              |

|     |                                     |   |        |       |                                     |   |        |       |
|-----|-------------------------------------|---|--------|-------|-------------------------------------|---|--------|-------|
|     | Leaf Temperature + Plant Density    | 4 | 97.796 | 0.092 | Leaf Temperature + Plant Density    | 4 | 89.024 | 0.101 |
| 500 |                                     |   |        |       |                                     |   |        |       |
|     | Abandoned Fields                    | 3 | 88.835 | 0.462 | Abandoned Fields                    | 3 | 79.614 | 0.488 |
|     | Abandoned Fields + Leaf Temperature | 4 | 91.574 | 0.499 | Abandoned Fields + Leaf Temperature | 4 | 82.427 | 0.519 |
|     | Abandoned Fields + Plant Density    | 4 | 92.163 | 0.464 | Forest + Abandoned Fields           | 4 | 82.928 | 0.489 |
|     | Forest + Abandoned Fields           | 4 | 92.192 | 0.462 | Abandoned Fields + Plant Density    | 4 | 82.972 | 0.488 |
|     | Leaf Temperature                    | 3 | 94.734 | 0.068 | Leaf Temperature                    | 3 | 86.155 | 0.062 |
|     | Plant Density                       | 3 | 95.348 | 0.018 | Plant Density                       | 3 | 86.597 | 0.026 |
|     | <b>Forest</b>                       | 3 | 95.495 | 0.006 | <b>Forest</b>                       | 3 | 86.913 | 0.000 |
|     | Leaf Temperature + Plant Density    | 4 | 97.796 | 0.092 | Leaf Temperature + Plant Density    | 4 | 89.024 | 0.101 |
|     | Forest + Leaf Temperature           | 4 | 98.078 | 0.070 | Forest + Leaf Temperature           | 4 | 89.474 | 0.065 |
|     | Forest + Plant density              | 4 | 98.603 | 0.027 | Forest + Plant density              | 4 | 89.944 | 0.027 |

**Table S4.** Hurdle models for pan traps data showing the relationships of truncated trapped abundance and trapped richness of wild bees as a function of different factors at the 2000 m, 1000 m, and 500 m scales. The Akaike Information Criterion for small samples (AICc) and the Nagelkerke's ratio adjusted pseudo- $R^2$  (adj.  $R^2$ ) from the regression models are presented. Models are sorted according to their AICc. K represents the number of parameters in the model. Forest, in bold font, is the main factor to be tested whereas covariates, in normal font, correspond to potentially confounding factors. All models represent truncated Negative Binomial regressions.

| Radius (m) |                                     | Trapped Abundance |         |            | Trapped Richness                    |   |         |            |
|------------|-------------------------------------|-------------------|---------|------------|-------------------------------------|---|---------|------------|
| 2000       | Model                               | K                 | AICc    | adj- $R^2$ | Model                               | K | AICc    | adj- $R^2$ |
|            | <b>Forest</b>                       | 5                 | 89.470  | 0.916      | <b>Forest</b>                       | 5 | 84.740  | 0.713      |
|            | Forest + Abandoned Fields           | 7                 | 96.780  | 0.831      | Abandoned Fields                    | 5 | 91.430  | 0.565      |
|            | Forest + Plant density              | 7                 | 96.950  | 0.929      | Leaf Temperature                    | 5 | 91.570  | 0.229      |
|            | Forest + Leaf Temperature           | 7                 | 99.400  | 0.918      | Forest + Abandoned Fields           | 7 | 91.600  | 0.628      |
|            | Leaf Temperature                    | 5                 | 100.430 | 0.533      | Forest + Plant density              | 7 | 92.060  | 0.753      |
|            | Abandoned Fields                    | 5                 | 100.670 | 0.690      | Plant Density                       | 5 | 93.340  | 0.088      |
|            | Plant Density                       | 5                 | 102.350 | 0.195      | Forest + Leaf Temperature           | 7 | 94.520  | 0.726      |
|            | Abandoned Fields + Leaf Temperature | 7                 | 108.540 | 0.691      | Abandoned Fields + Leaf Temperature | 7 | 99.530  | 0.518      |
|            | Leaf Temperature + Plant Density    | 7                 | 109.870 | 0.656      | Abandoned Fields + Plant Density    | 7 | 100.340 | 0.579      |
|            | Abandoned Fields + Plant Density    | 7                 | 110.250 | 0.673      | Leaf Temperature + Plant Density    | 7 | 100.430 | 0.432      |
| 1000       |                                     |                   |         |            |                                     |   |         |            |
|            | <b>Forest</b>                       | 5                 | 91.940  | 0.929      | <b>Forest</b>                       | 5 | 85.260  | 0.735      |
|            | Abandoned Fields                    | 5                 | 97.160  | 0.877      | Abandoned Fields                    | 5 | 88.450  | 0.725      |
|            | Forest + Abandoned Fields           | 7                 | 98.450  | 0.852      | Leaf Temperature                    | 5 | 91.570  | 0.229      |
|            | Forest + Plant density              | 7                 | 99.270  | 0.953      | Forest + Abandoned Fields           | 7 | 91.850  | 0.671      |
|            | Leaf Temperature                    | 5                 | 100.430 | 0.533      | Forest + Plant density              | 7 | 92.030  | 0.816      |
|            | Forest + Leaf Temperature           | 7                 | 101.280 | 0.948      | Plant Density                       | 5 | 93.340  | 0.088      |
|            | Plant Density                       | 5                 | 102.350 | 0.195      | Forest + Leaf Temperature           | 7 | 94.740  | 0.779      |
|            | Abandoned Fields + Leaf Temperature | 7                 | 105.730 | 0.883      | Abandoned Fields + Leaf Temperature | 7 | 97.100  | 0.717      |
|            | Abandoned Fields + Plant Density    | 7                 | 107.030 | 0.871      | Abandoned Fields + Plant Density    | 7 | 97.750  | 0.758      |

|     |                                     |   |         |       |                                     |   |         |        |
|-----|-------------------------------------|---|---------|-------|-------------------------------------|---|---------|--------|
|     | Leaf Temperature + Plant Density    | 7 | 109.870 | 0.656 | Leaf Temperature + Plant Density    | 7 | 100.430 | 0.432  |
| 500 |                                     |   |         |       |                                     |   |         |        |
|     | Abandoned Fields                    | 5 | 96.040  | 0.968 | Abandoned Fields                    | 5 | 86.900  | 0.875  |
|     | Leaf Temperature                    | 5 | 100.430 | 0.533 | Leaf Temperature                    | 5 | 91.570  | 0.229  |
|     | <b>Forest</b>                       | 5 | 101.550 | 0.268 | <b>Forest</b>                       | 5 | 93.130  | -0.097 |
|     | Plant Density                       | 5 | 102.350 | 0.195 | Plant Density                       | 5 | 93.340  | 0.088  |
|     | Abandoned Fields + Leaf Temperature | 7 | 103.690 | 0.968 | Abandoned Fields + Leaf Temperature | 7 | 94.730  | 0.879  |
|     | Forest + Abandoned Fields           | 7 | 105.150 | 0.947 | Forest + Abandoned Fields           | 7 | 96.160  | 0.842  |
|     | Abandoned Fields + Plant Density    | 7 | 105.800 | 0.964 | Abandoned Fields + Plant Density    | 7 | 96.370  | 0.871  |
|     | Forest + Leaf Temperature           | 7 | 109.610 | 0.814 | Leaf Temperature + Plant Density    | 7 | 100.430 | 0.432  |
|     | Leaf Temperature + Plant Density    | 7 | 109.870 | 0.656 | Forest + Leaf Temperature           | 7 | 101.330 | 0.254  |
|     | Forest + Plant density              | 7 | 110.990 | 0.601 | Forest + Plant density              | 7 | 102.130 | 0.326  |

**Table S5.** Hurdle models for pan trap data showing the relationship of trapped abundance of wild bees as a function of different factors at 2000 m, 1000 m, and 500 m radii. Incidence Rate Ratios (IRR) and their 95% Confidence Intervals are presented for each variable in the models. Forest, in bold font, is the main factor to be tested whereas Covariate corresponds to potentially confounding factors. The count part is based on truncated Negative Binomial models. The zero part is based on a binary logit model. Statistically significant effects are shown in bold.

| Count models |                           | Forest       |               | Covariate |               |
|--------------|---------------------------|--------------|---------------|-----------|---------------|
| Radius (m)   | Model                     | IRR          | 95% CI        | IRR       | 95% CI        |
| 2000         |                           |              |               |           |               |
|              | <b>Forest</b>             | <b>1.055</b> | 1.030 – 1.081 |           |               |
|              | Forest + Abandoned Fields | <b>1.057</b> | 1.030 – 1.084 | 1.012     | 0.983 – 1.043 |
|              | Forest + Temperature      | <b>1.054</b> | 1.028 – 1.081 | 0.961     | 0.789 – 1.171 |
|              | Forest + Shrub Density    | <b>1.055</b> | 1.033 – 1.077 | 0.998     | 0.997 – 100   |
| 1000         |                           |              |               |           |               |
|              | <b>Forest</b>             | <b>1.051</b> | 1.023 – 1.081 |           |               |
|              | Forest + Abandoned Fields | <b>1.047</b> | 1.017 – 1.079 | 1.013     | 0.971 – 1.057 |
|              | Forest + Temperature      | <b>1.048</b> | 1.020 – 1.077 | 0.904     | 0.725 – 1.128 |
|              | Forest + Shrub Density    | <b>1.053</b> | 1.027 – 1.079 | 0.998     | 0.996 – 100   |
| 500          |                           |              |               |           |               |
|              | <b>Forest</b>             | 1.021        | 0.973 – 1.072 |           |               |
|              | Forest + Abandoned Fields | 1.012        | 0.970 – 1.056 | 1.041     | 0.989 – 1.095 |
|              | Forest + Temperature      | 1.021        | 0.971 – 1.073 | 0.794     | 0.578 – 1.091 |
|              | Forest + Shrub Density    | 1.025        | 0.976 – 1.076 | 0.998     | 0.994 – 1.002 |
| Zero models  |                           |              |               |           |               |
| 2000         |                           |              |               |           |               |
|              | <b>Forest</b>             | 0.985        | 0.928 – 1.046 |           |               |
|              | Forest + Abandoned Fields | 0.976        | 0.917 – 1.037 | 1.068     | 0.969 – 1.177 |
|              | Forest + Temperature      | 0.992        | 0.922 – 1.066 | 1.109     | 0.604 – 2.036 |
|              | Forest + Shrub Density    | 0.985        | 0.928 – 1.045 | 1.001     | 0.995 – 1.007 |
| 1000         |                           |              |               |           |               |
|              | <b>Forest</b>             | 0.979        | 0.925 – 1.035 |           |               |
|              | Forest + Abandoned Fields | 0.964        | 0.903 – 1.029 | 1.071     | 0.986 – 1.163 |
|              | Forest + Temperature      | 0.982        | 0.919 – 1.049 | 1.053     | 0.574 – 1.932 |
|              | Forest + Shrub Density    | 0.978        | 0.925 – 1.035 | 1.001     | 0.995 – 1.007 |
| 500          |                           |              |               |           |               |
|              | <b>Forest</b>             | 0.978        | 0.924 – 1.036 |           |               |
|              | Forest + Abandoned Fields | 0.973        | 0.916 – 1.034 | 1.063     | 0.983 – 1.149 |
|              | Forest + Temperature      | 0.981        | 0.917 – 1.050 | 1.056     | 0.576 – 1.937 |
|              | Forest + Shrub Density    | 0.978        | 0.924 – 1.036 | 1.000     | 0.994 – 1.007 |

**Table S6.** Hurdle models for pan trap data showing the relationship of trapped richness of wild bees as a function of different factors at 2000 m, 1000 m, and 500 m radii. Incidence Rate Ratios (IRR) and their 95% Confidence Intervals are presented for each variable in the models. Forest, in bold font, is the main factor to be tested whereas Covariate corresponds to potentially confounding factors. The count part is based on Negative Binomial models. The zero part is based on a binary logit model. Statistically significant effects are shown in bold.

| Count models |                           | Forest       |               | Covariate |               |
|--------------|---------------------------|--------------|---------------|-----------|---------------|
| Radius (m)   | Model                     | IRR          | 95% CI        | IRR       | 95% CI        |
| 2000         |                           |              |               |           |               |
|              | <b>Forest</b>             | <b>1.041</b> | 1.018 – 1.065 |           |               |
|              | Forest + Abandoned Fields | <b>1.044</b> | 1.019 – 1.069 | 1.014     | 0.988 – 1.042 |
|              | Forest + Temperature      | <b>1.040</b> | 1.016 – 1.064 | 0.948     | 0.786 – 1.142 |
|              | Forest + Shrub Density    | <b>1.042</b> | 1.021 – 1.062 | 0.998     | 0.996 – 1.000 |
| 1000         |                           |              |               |           |               |
|              | <b>Forest</b>             | <b>1.040</b> | 1.016 – 1.064 |           |               |
|              | Forest + Abandoned Fields | <b>1.037</b> | 1.01 – 1.064  | 1.010     | 0.974 – 1.048 |
|              | Forest + Temperature      | <b>1.037</b> | 1.012 – 1.062 | 0.919     | 0.749 – 1.127 |
|              | Forest + Shrub Density    | <b>1.042</b> | 1.02 – 1.063  | 0.998     | 0.996 – 1.000 |
| 500          |                           |              |               |           |               |
|              | <b>Forest</b>             | 1.013        | 0.973 – 1.054 |           |               |
|              | Forest + Abandoned Fields | 1.007        | 0.973 – 1.042 | 1.032     | 0.993 – 1.073 |
|              | Forest + Temperature      | 1.007        | 0.969 – 1.046 | 0.826     | 0.63 – 1.082  |
|              | Forest + Shrub Density    | 1.019        | 0.975 – 1.065 | 0.998     | 0.993 – 1.002 |
| Zero models  |                           |              |               |           |               |
| 2000         |                           |              |               |           |               |
|              | <b>Forest</b>             | 0.985        | 0.928 – 1.046 |           |               |
|              | Forest + Abandoned Fields | 0.976        | 0.917 – 1.037 | 1.068     | 0.969 – 1.177 |
|              | Forest + Temperature      | 0.992        | 0.922 – 1.066 | 1.109     | 0.604 – 2.036 |
|              | Forest + Shrub Density    | 0.985        | 0.928 – 1.045 | 1.001     | 0.995 – 1.007 |
| 1000         |                           |              |               |           |               |
|              | <b>Forest</b>             | 0.979        | 0.925 – 1.035 |           |               |
|              | Forest + Abandoned Fields | 0.964        | 0.903 – 1.029 | 1.071     | 0.986 – 1.163 |
|              | Forest + Temperature      | 0.982        | 0.919 – 1.049 | 1.053     | 0.574 – 1.932 |
|              | Forest + Shrub Density    | 0.978        | 0.925 – 1.035 | 1.001     | 0.995 – 1.007 |
| 500          |                           |              |               |           |               |
|              | <b>Forest</b>             | 0.978        | 0.924 – 1.036 |           |               |
|              | Forest + Abandoned Fields | 0.973        | 0.916 – 1.034 | 1.063     | 0.983 – 1.149 |
|              | Forest + Temperature      | 0.981        | 0.917 – 1.05  | 1.056     | 0.576 – 1.937 |
|              | Forest + Shrub Density    | 0.978        | 0.924 – 1.036 | 1.000     | 0.994 – 1.007 |
